# Supplementary material for: Towards Sustainable Food Systems: Exploring Household Food Waste by Photographic Diary in Relation to Unprocessed, Processed and Ultra-Processed Food
Source: MDPI journal article supplement (doi:10.3390/su15032051), 2023-01-21
Supplement: s1 [file s1]

Archive with 1 entries (1 files):
- sustainability-2134311-supplementary.pdf
