# Supplementary material for: Towards Sustainable Food Systems: Exploring Household Food Waste by Photographic Diary in Relation to Unprocessed, Processed and Ultra-Processed Food
Source: MDPI journal article supplement (doi:10.3390/su15032051), 2023-01-21
Supplement: s1 [file s1 › sustainability-2134311-supplementary.pdf]

**Supplementary material. Table S1.** Examples of how the photographic data were classified

|                                                                                                                                                                                                                                                                                                                                                                                                                                                                                                                                                                                 |                                                                                      |
|---------------------------------------------------------------------------------------------------------------------------------------------------------------------------------------------------------------------------------------------------------------------------------------------------------------------------------------------------------------------------------------------------------------------------------------------------------------------------------------------------------------------------------------------------------------------------------|--------------------------------------------------------------------------------------|
| For individuals who used their hands as a measure of scale, a measurement of the hand by ruler was included.                                                                                                                                                                                                                                                                                                                                                                                                                                                                    | 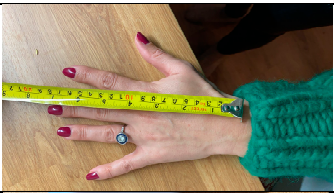   |
| The researcher categorised the food as teabag, drinks category, NOVA 1, preparation phase and unavoidable. Weight of teabag was estimated using the novel library of standard photographs, by direct weighing of the food observed in the photograph.                                                                                                                                                                                                                                                                                                                           | 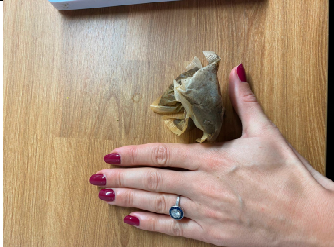   |
| The researcher categorised the food as red pepper, vegetable category, NOVA 1, preparation phase and potentially avoidable. Weight of pepper was estimated using the novel library of standard photographs, by direct weighing of the food observed in the photograph.                                                                                                                                                                                                                                                                                                          | 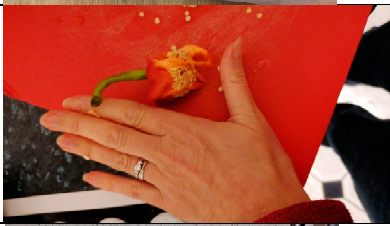   |
| The researcher categorised the food as peas, vegetable category, NOVA 1, consumption phase and avoidable. Weight of one pea was estimated using the novel library of standard photographs, by direct weighing of one pea and then counting the peas in the photograph and multiplying accordingly.                                                                                                                                                                                                                                                                              | 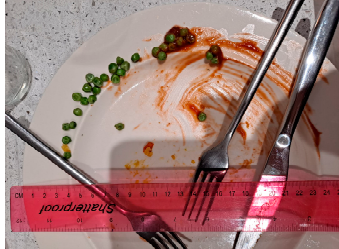  |
| The researcher categorised each food separately. First, cucumber, vegetable category, NOVA 1, preparation phase and avoidable. Weight of cucumber slice was estimated using the novel library of standard photographs, by direct weighing of the food observed in the photograph. Second, red onion, vegetable category, NOVA 1, preparation phase, unavoidable. Weight of red onion peeling was estimated by using the novel library of standard photographs, by direct weighing of the estimated volume of food as calculated by measure of scale observed in the photograph. | 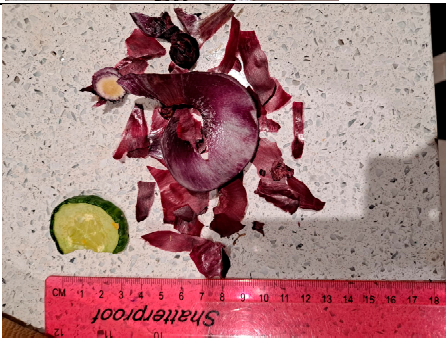 |
| The researcher categorised the food as cake, sweet category, NOVA 4, consumption phase and avoidable. As cake (density unit of 0.415) is included in the FAO/INFOODS Density Database, the approximate volume of cake was estimated based on a visual estimate of the photograph and applied to the density unit to calculate a weight.                                                                                                                                                                                                                                         | 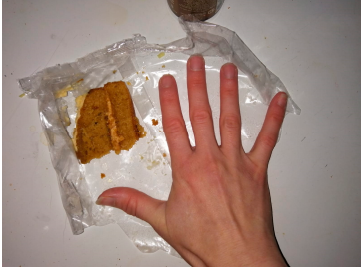 |

**Supplementary Materials. Table S2.** Measure of variance: mean and standard deviation of household groups showing statistical significance

| Demographic Variable          | Food Waste Category   | Minimum (g) | Maximum (g) | Mean (g) | Standard deviation (g) |
|-------------------------------|-----------------------|-------------|-------------|----------|------------------------|
| One-person household          | Avoidable             | 0           | 3418        | 688      | 828                    |
|                               | Unavoidable           | 27          | 657         | 360      | 219                    |
|                               | Potentially Avoidable | 0           | 2544        | 305      | 604                    |
| Two-person household          | Avoidable             | 0           | 1402        | 192      | 281                    |
|                               | Unavoidable           | 5           | 1053        | 364      | 225                    |
|                               | Potentially Avoidable | 4           | 719         | 208      | 179                    |
| Three-person household        | Avoidable             | 3           | 1489        | 489      | 414                    |
|                               | Unavoidable           | 0           | 811         | 207      | 221                    |
|                               | Potentially Avoidable | 19          | 543         | 170      | 166                    |
| Four or more person household | Avoidable             | 13          | 1693        | 378      | 354                    |
|                               | Unavoidable           | 36          | 2953        | 369      | 519                    |
|                               | Potentially Avoidable | 0           | 661         | 163      | 161                    |
| Post-graduate group           | Avoidable             | 0           | 1489        | 339      | 355                    |
|                               | Unavoidable           | 0           | 2953        | 328      | 397                    |
|                               | Potentially Avoidable | 0           | 701         | 182      | 155                    |
| Degree group                  | Avoidable             | 0           | 3418        | 475      | 686                    |
|                               | Unavoidable           | 4           | 811         | 370      | 220                    |
|                               | Potentially Avoidable | 0           | 2544        | 293      | 478                    |
| Below degree group            | Avoidable             | 0           | 1402        | 440      | 481                    |
|                               | Unavoidable           | 5           | 1053        | 303      | 375                    |
|                               | Potentially Avoidable | 0           | 264         | 71       | 82                     |
